# Supplementary material for: Naphtho[1,2-b:5,6-b′]dithiophene-based copolymers for applications to polymer solar cells
Source: Royal Society of Chemistry journal article supplement (doi:10.1039/c3py21062f), 2013-01-01
Supplement: c3py21062f.pdf [file c3py21062f.pdf]

## Electronic Supplementary Information

### Naphtho[1,2-b:5,6-b']dithiophene-based Copolymers for Application to Polymer Solar Cells

Chinna Bathula, Chang Eun Song, Badgujar Sachin, Seong-Jin Hong, Song Yi Park, Won Suk  
Shin, Jong-Cheol Lee, Shinuk Cho, Taek Ahn, Sang-Jin Moon, and Sang Kyu Lee

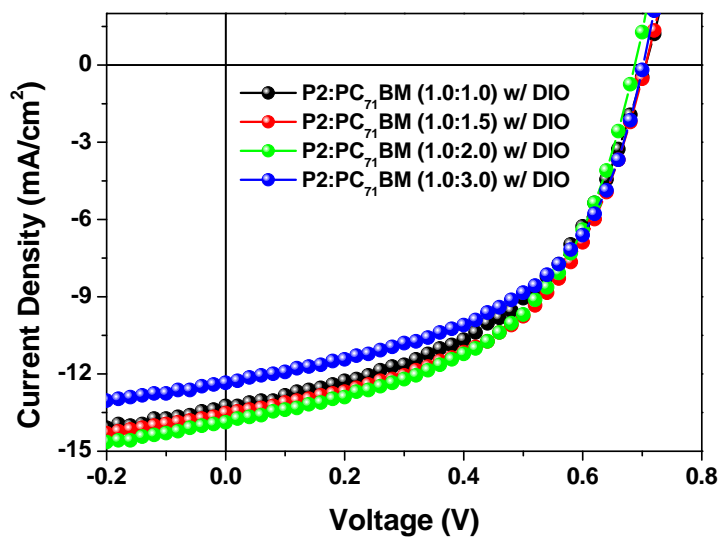

(a)

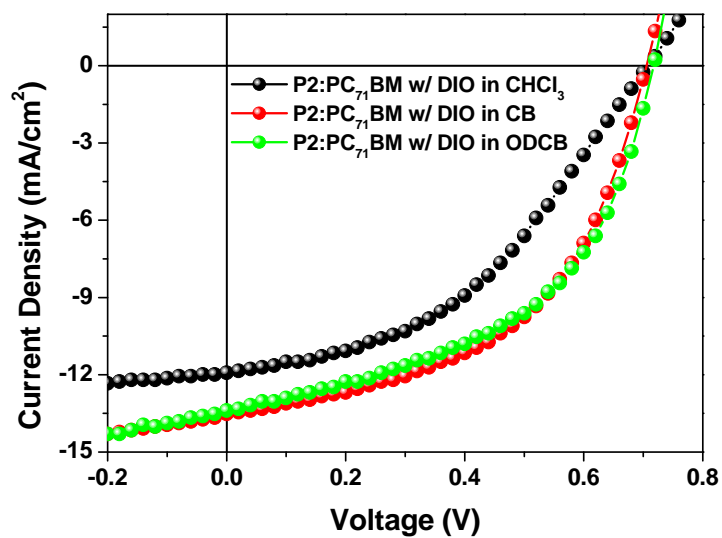

(b)

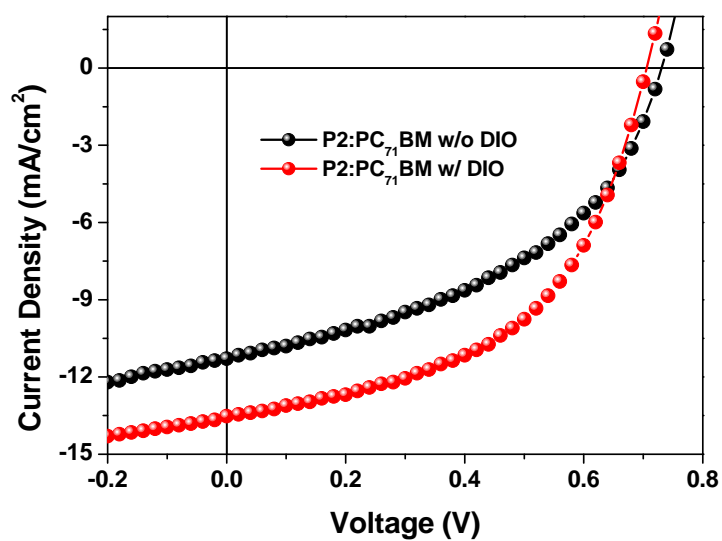

(c)

Figure S1. The performances of the PSC materials under variety of conditions. (a) the blend ratio of polymer to PC<sub>71</sub>BM; (b) type of solvents; (c) with or without the use of 1,8-diiodooctane.

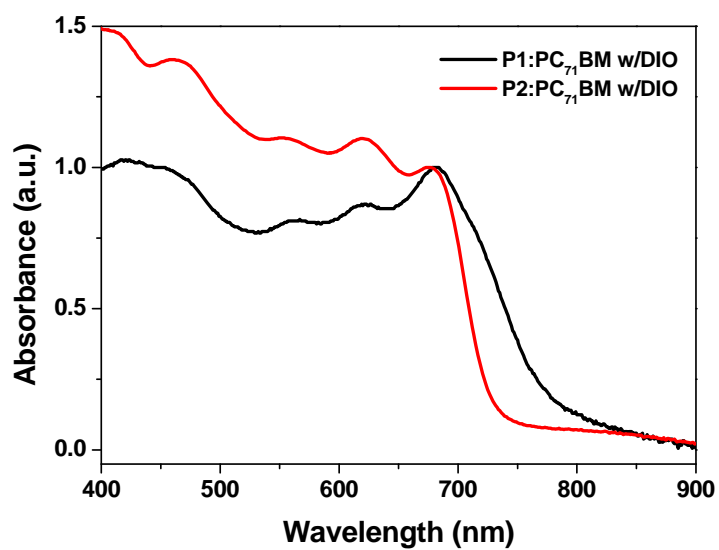

Figure S2. UV-Vis absorption spectra of films spin coated from P1:PC<sub>71</sub>BM (black line) and P2:PC<sub>71</sub>BM (red line).
